# Supplementary material for: DABCO-based ionic liquids: green and recyclable catalysts for the synthesis of barbituric and thiobarbituric acid derivatives in aqueous media
Source: Royal Society of Chemistry journal article supplement (doi:10.1039/c6ra05878g), 2016-01-01

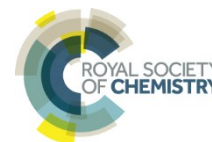

Journal Name

ARTICLE

Electronic Supplementary Material (ESI) for RSC Advances.

## DABCO-Based ionic liquids: green and recyclable catalysts for the synthesis of barbituric and thiobarbituric acid derivatives in aqueous media

Narges Seyyedi, Farhad Shirini\* and Mohaddeseh Safarpour Nikoo Langarudi

Department of Chemistry, College of Science, University of Guilan, Rasht, 41335-19141, Iran, Tel/Fax: +981313233262; e-mail: shirini@guilan.ac.ir (and also fshirini@gmail.com).

### Supporting information

| Catalogue                                                                                                                                   |  | Page |
|---------------------------------------------------------------------------------------------------------------------------------------------|--|------|
| 1. Characterization and mass spectra of [DABCO](SO <sub>3</sub> H) <sub>2</sub> Cl <sub>2</sub> .....                                       |  | 2    |
| 2. Hammett acidity and FT-IR of [DABCO](SO <sub>3</sub> H) <sub>2</sub> Cl <sub>2</sub> .....                                               |  | 3    |
| 3. The <sup>1</sup> HNMR of [DABCO](SO <sub>3</sub> H) <sub>2</sub> Cl <sub>2</sub> .....                                                   |  | 4    |
| 4. The <sup>13</sup> CNMR of [DABCO](SO <sub>3</sub> H) <sub>2</sub> Cl <sub>2</sub> .....                                                  |  | 5    |
| 5. Characterization and mass spectra of [DABCO](SO <sub>3</sub> H) <sub>2</sub> (HSO <sub>4</sub> ) <sub>2</sub> .....                      |  | 6    |
| 6. Hammett acidity and FT-IR of [DABCO](SO <sub>3</sub> H) <sub>2</sub> (HSO <sub>4</sub> ) <sub>2</sub> .....                              |  | 7    |
| 7. The <sup>1</sup> HNMR of [DABCO](SO <sub>3</sub> H) <sub>2</sub> (HSO <sub>4</sub> ) <sub>2</sub> .....                                  |  | 8    |
| 8. The <sup>13</sup> CNMR of [DABCO](SO <sub>3</sub> H) <sub>2</sub> (HSO <sub>4</sub> ) <sub>2</sub> .....                                 |  | 9    |
| 9. Characterization and FT-IR of 5,5'-(1,4-Phenylenebis(methanylylidene))bis(2-thioxodihydropyrimidine-4,6(1H,5H)-dione).....               |  | 10   |
| 10. The <sup>1</sup> HNMR of 5,5'-(1,4-Phenylenebis(methanylylidene))bis(2-thioxodihydropyrimidine-4,6(1H,5H)-dione).....                   |  | 11   |
| 11. The <sup>13</sup> CNMR of 5,5'-(1,4-Phenylenebis(methanylylidene))bis(2-thioxodihydropyrimidine-4,6(1H,5H)-dione).....                  |  | 12   |
| 12. Characterization and FT-IR of 5,5'-(1,3-phenylenebis(methanylylidene))bis(2-thioxodihydropyrimidine-4,6(1H,5H)-dione).....              |  | 13   |
| 13. The <sup>1</sup> HNMR of 5,5'-(1,3-phenylenebis(methanylylidene))bis(2-thioxodihydropyrimidine-4,6(1H,5H)-dione).....                   |  | 14   |
| 14. The <sup>13</sup> CNMR of 5,5'-(1,3-phenylenebis(methanylylidene))bis(2-thioxodihydropyrimidine-4,6(1H,5H)-dione).....                  |  | 15   |
| 15. Characterization and FT-IR of 7-Amino-5-(2-nitrophenyl)-4-oxo-2-thioxo-1,3,4,5-tetrahydro-2H-pyrano[2,3-d]pyrimidine-6-carbonitrile ... |  | 16   |
| 16. The <sup>1</sup> HNMR of 7-Amino-5-(2-nitrophenyl)-4-oxo-2-thioxo-1,3,4,5-tetrahydro-2H-pyrano[2,3-d]pyrimidine-6-carbonitrile .....    |  | 17   |
| 17. The <sup>13</sup> CNMR of 7-Amino-5-(2-nitrophenyl)-4-oxo-2-thioxo-1,3,4,5-tetrahydro-2H-pyrano[2,3-d]pyrimidine-6-carbonitrile .....   |  | 18   |

**[DABCO](SO<sub>3</sub>H)<sub>2</sub>Cl<sub>2</sub>:**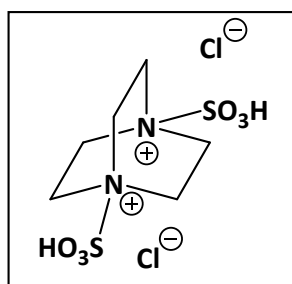

M.p. 75 °C; MS:  $m/z$  = 345 ( $M^+$ );  $H_0$  = 1.37; IR (KBr,  $\text{cm}^{-1}$ )  $\nu_{\text{max}}$ : 3500-2800 (broad), 1179, 881, 850;  $^1\text{H}$ NMR (400MHz, DMSO- $d_6$ ):  $\delta$  (ppm) 3.58 (s, 6H), 7.72 (s, 1H);  $^{13}\text{C}$ NMR (100MHz, DMSO- $d_6$ ):  $\delta$  (ppm) 43.2.

**Mass spectra**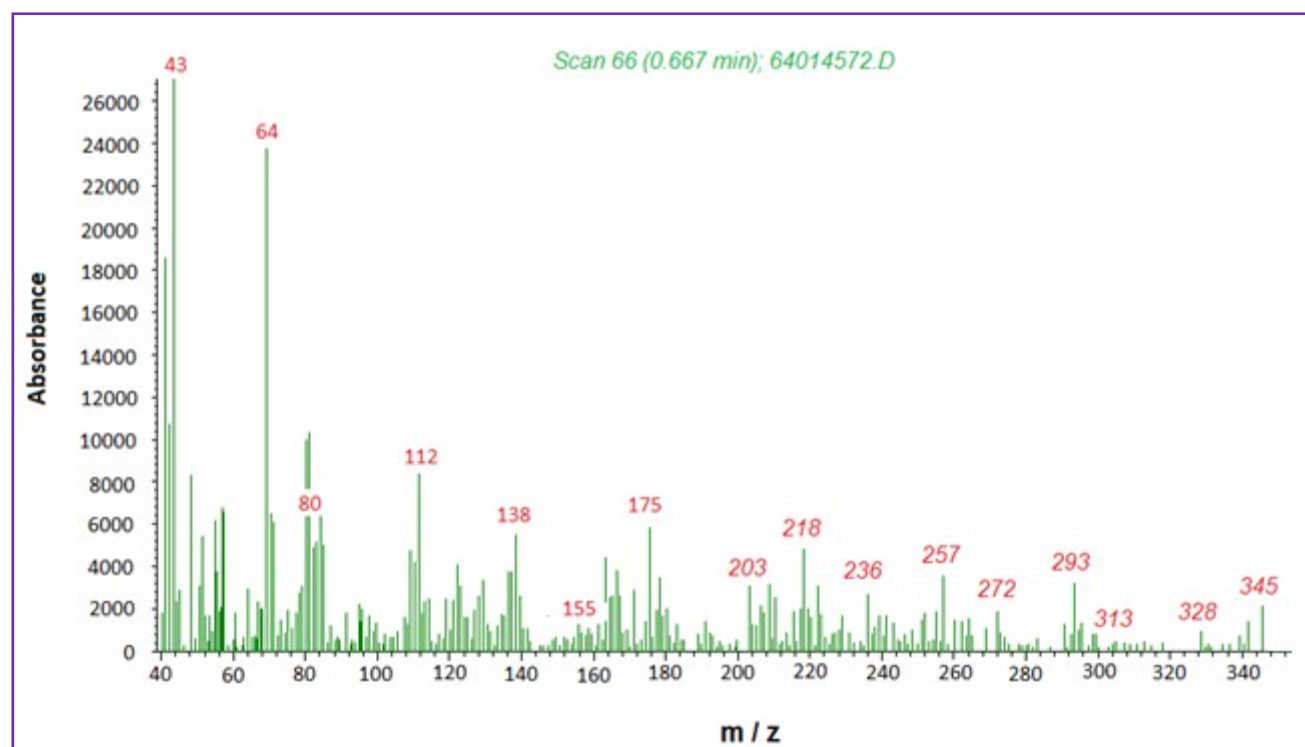

### Hammett acidity

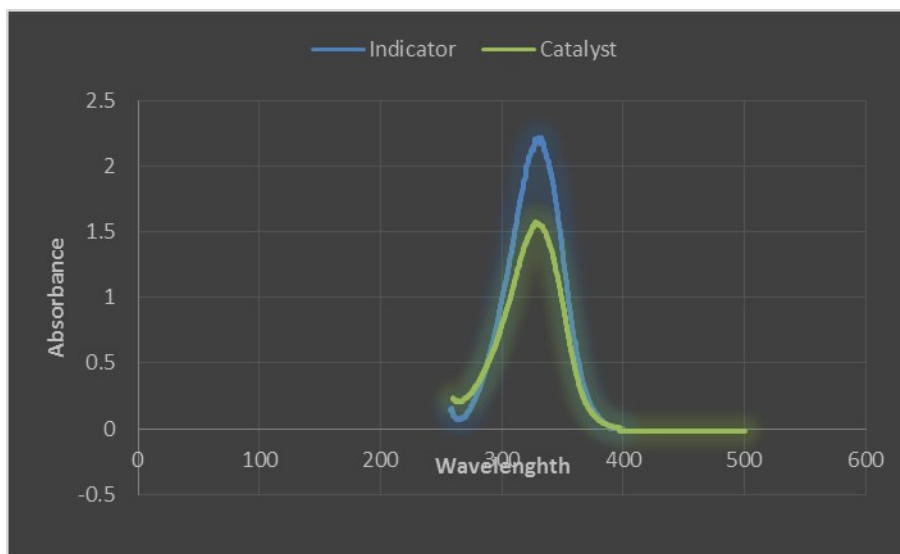

### FTIR

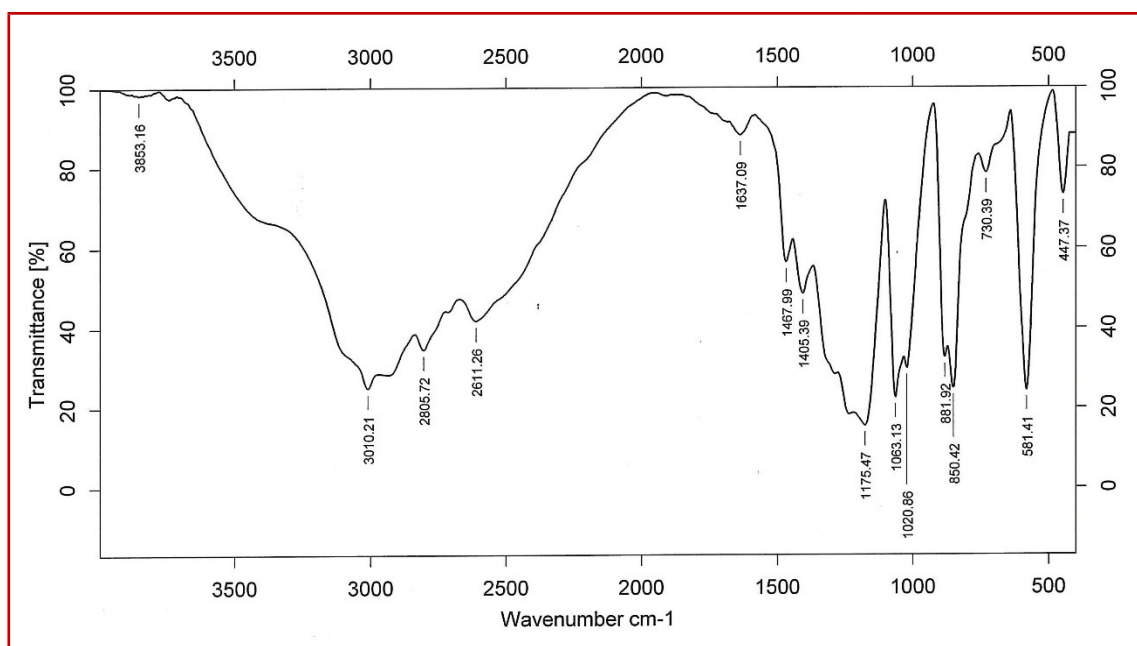

$^1\text{H}$ NMR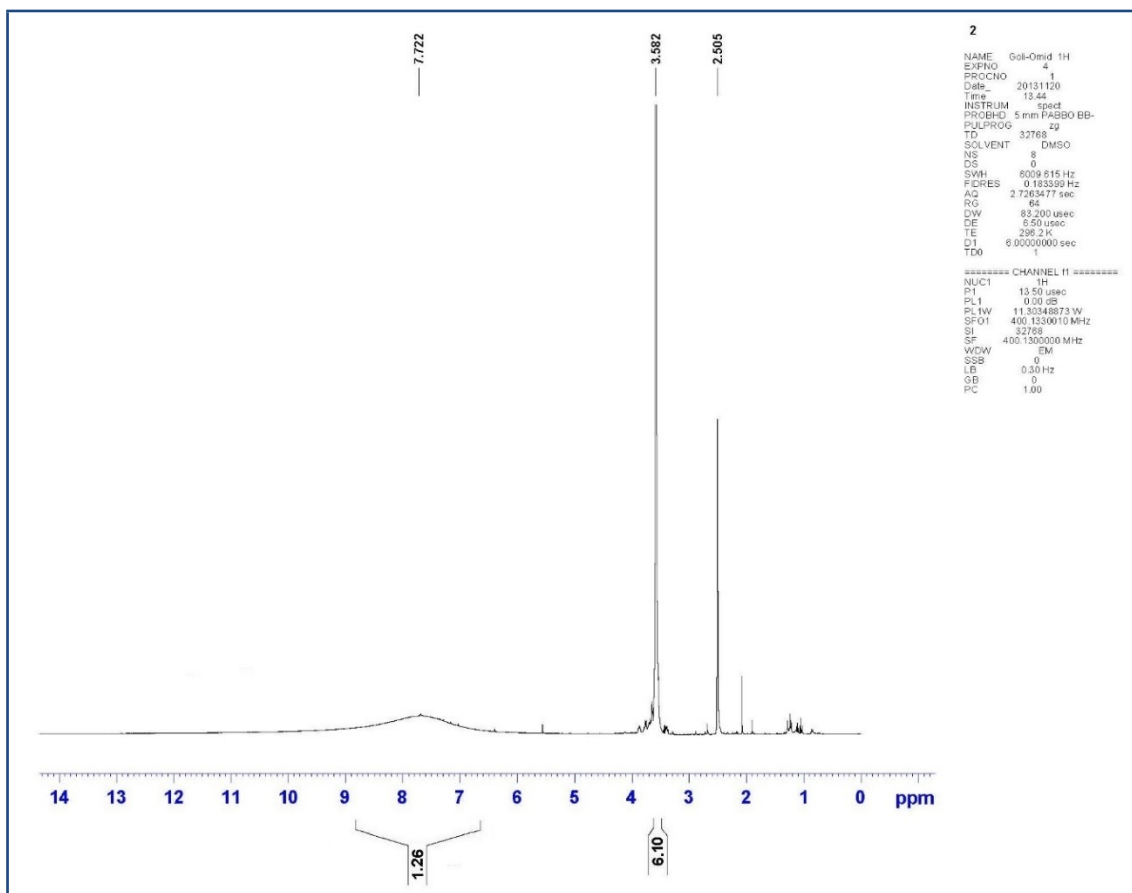

$^{13}\text{C}$ NMR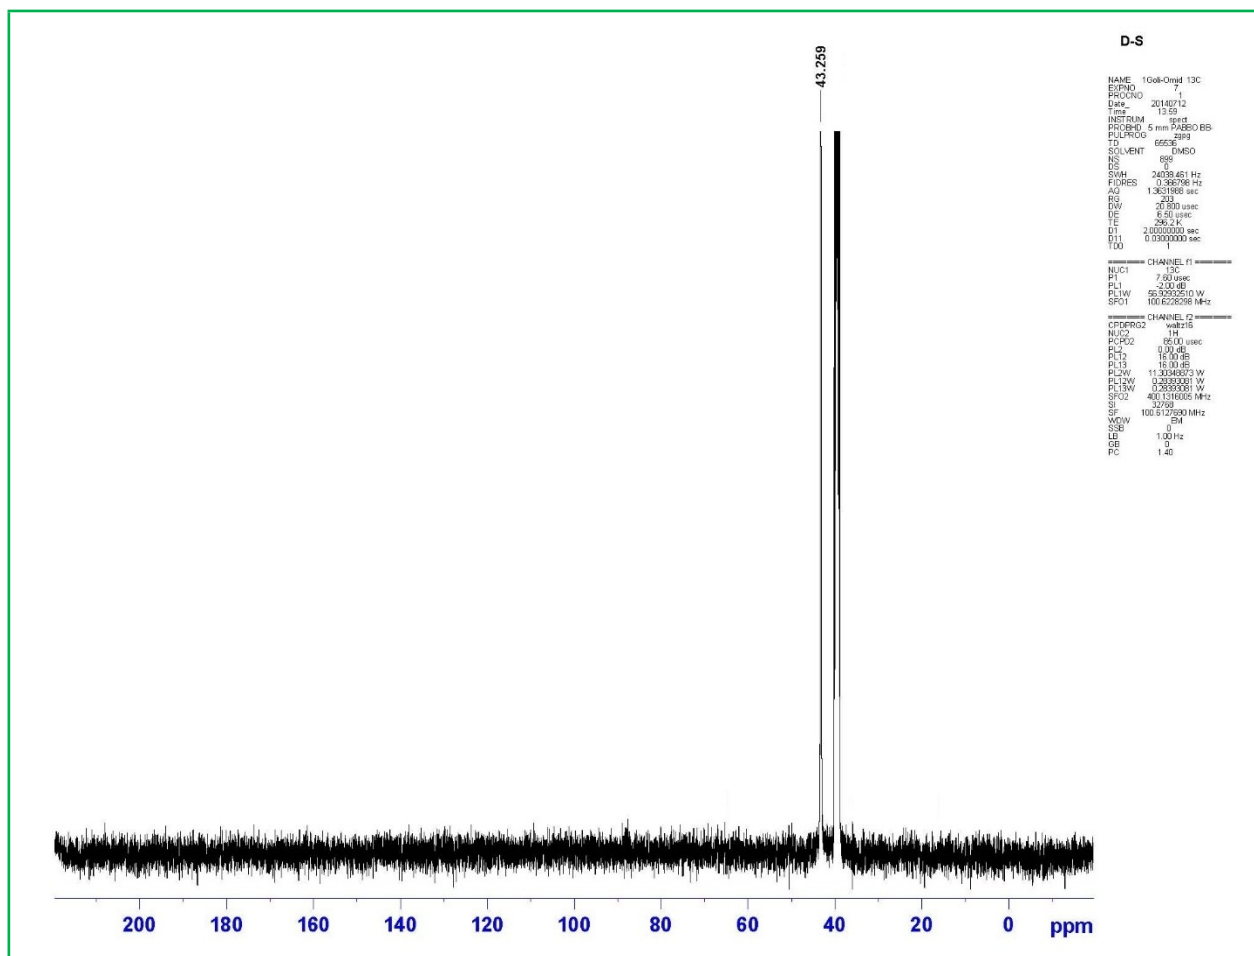

[DABCO](SO<sub>3</sub>H)<sub>2</sub>(HSO<sub>4</sub>)<sub>2</sub>:

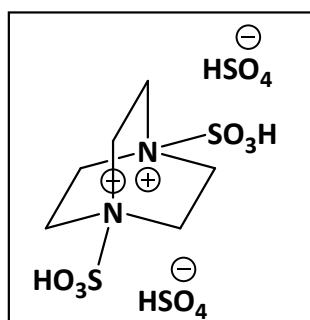

M.p. 70 °C; MS:  $m/z = 467(M^+)$ ;  $H_0 = 0.43$ ; FT-IR (KBr,  $\text{cm}^{-1}$ )  $\nu_{\text{max}}$ : 3405, 3010, 2922, 1405, 1289, 1173, 1062, 1006, 855;  $^1\text{H}$ NMR (400 MHz, DMSO- $d_6$ ):  $\delta$  (ppm) 3.59 (s, 6H), 6.97 (s, 1H, SO<sub>3</sub>H), 14.14 (s, 1H, HSO<sub>4</sub>);  $^{13}\text{C}$ NMR (100 MHz, DMSO- $d_6$ ):  $\delta$  (ppm) 43.2.

### Mass spectra

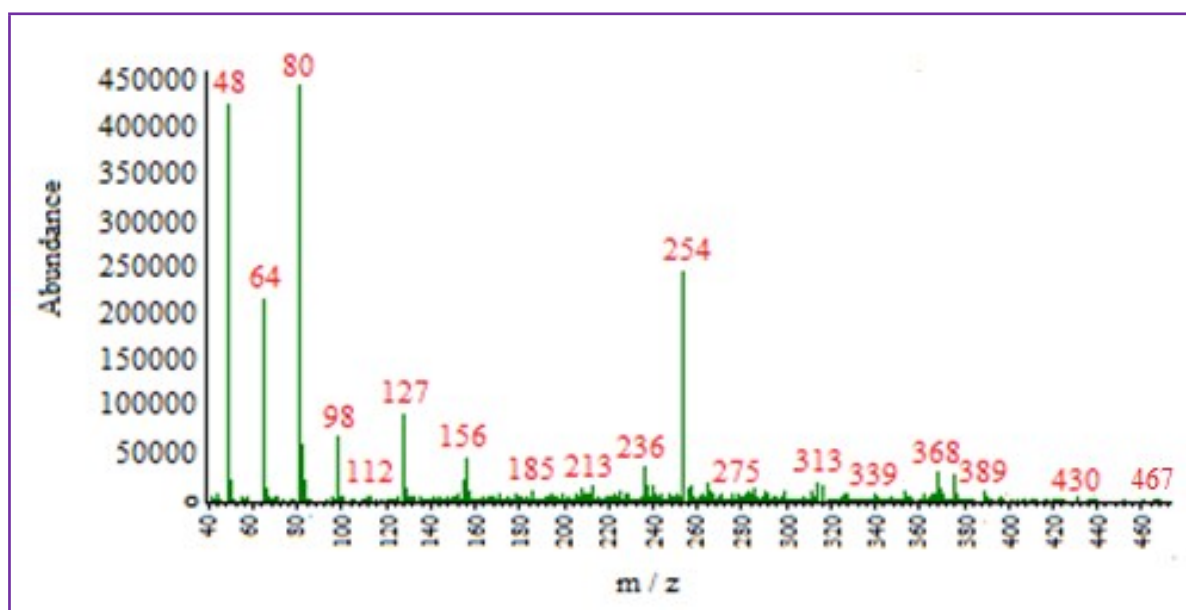

### Hammet acidity

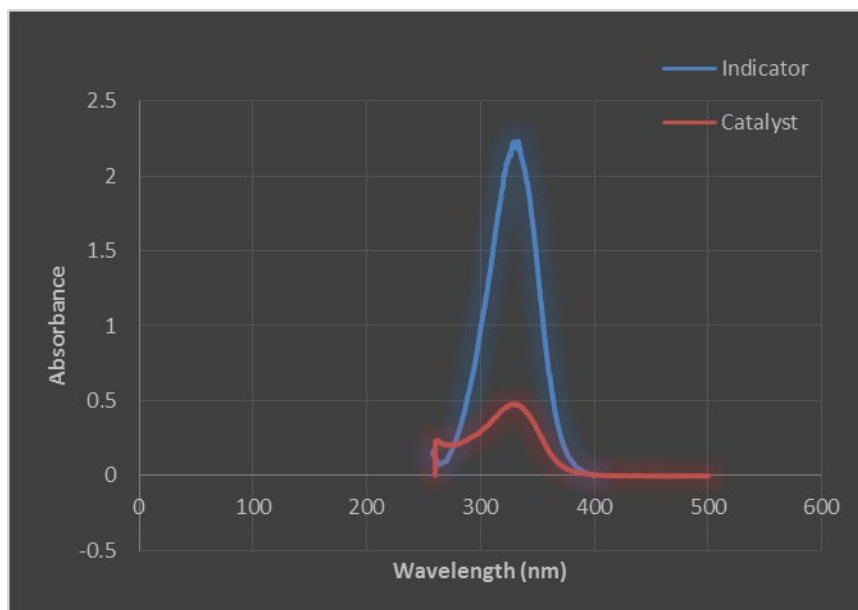

### FTIR

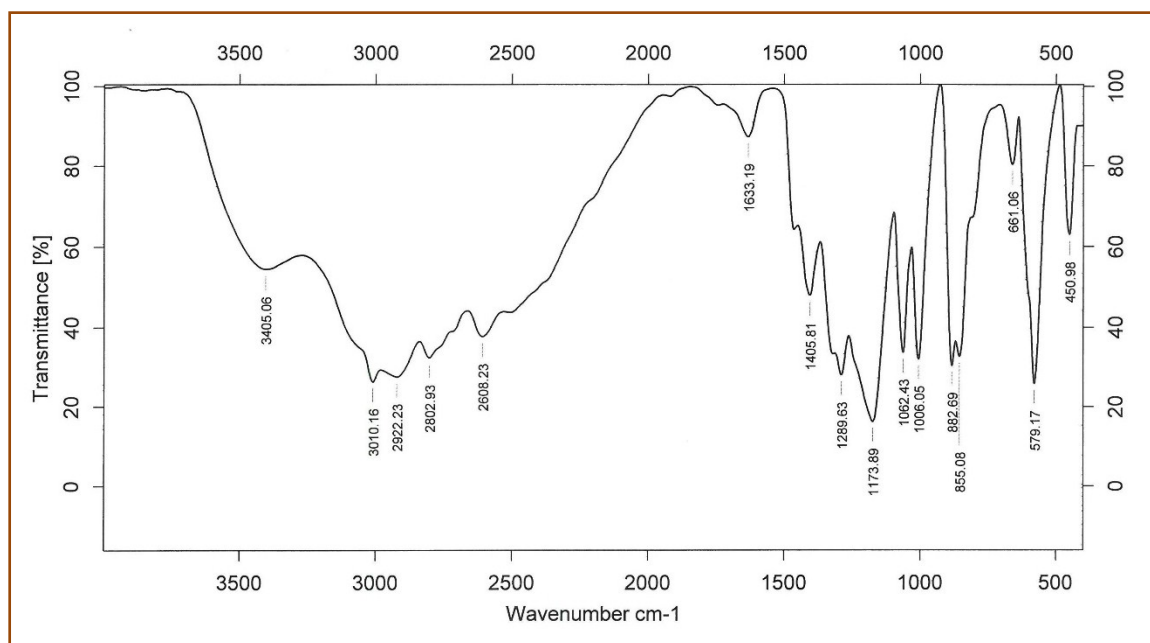

$^1\text{H}$ NMR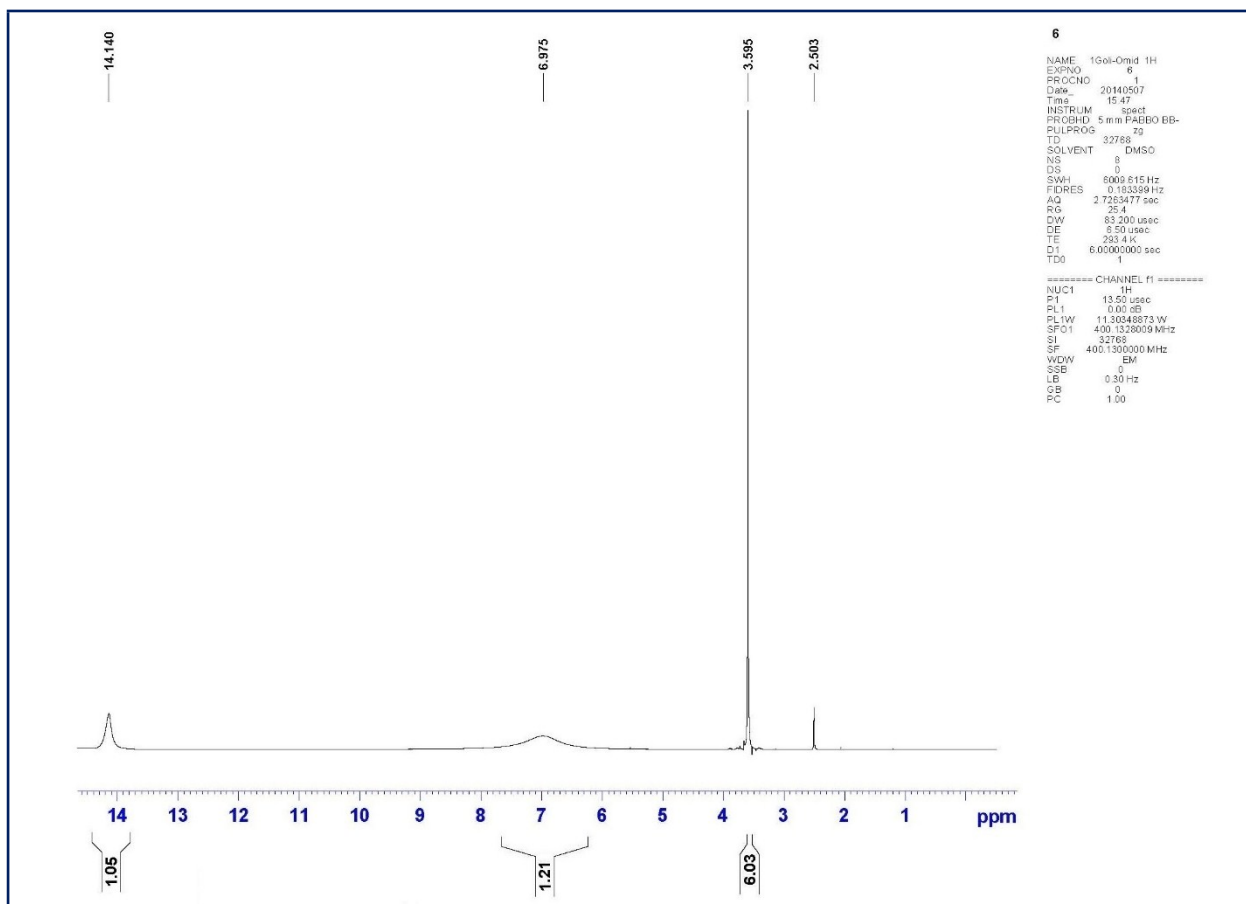



### $^{13}\text{C}$ NMR

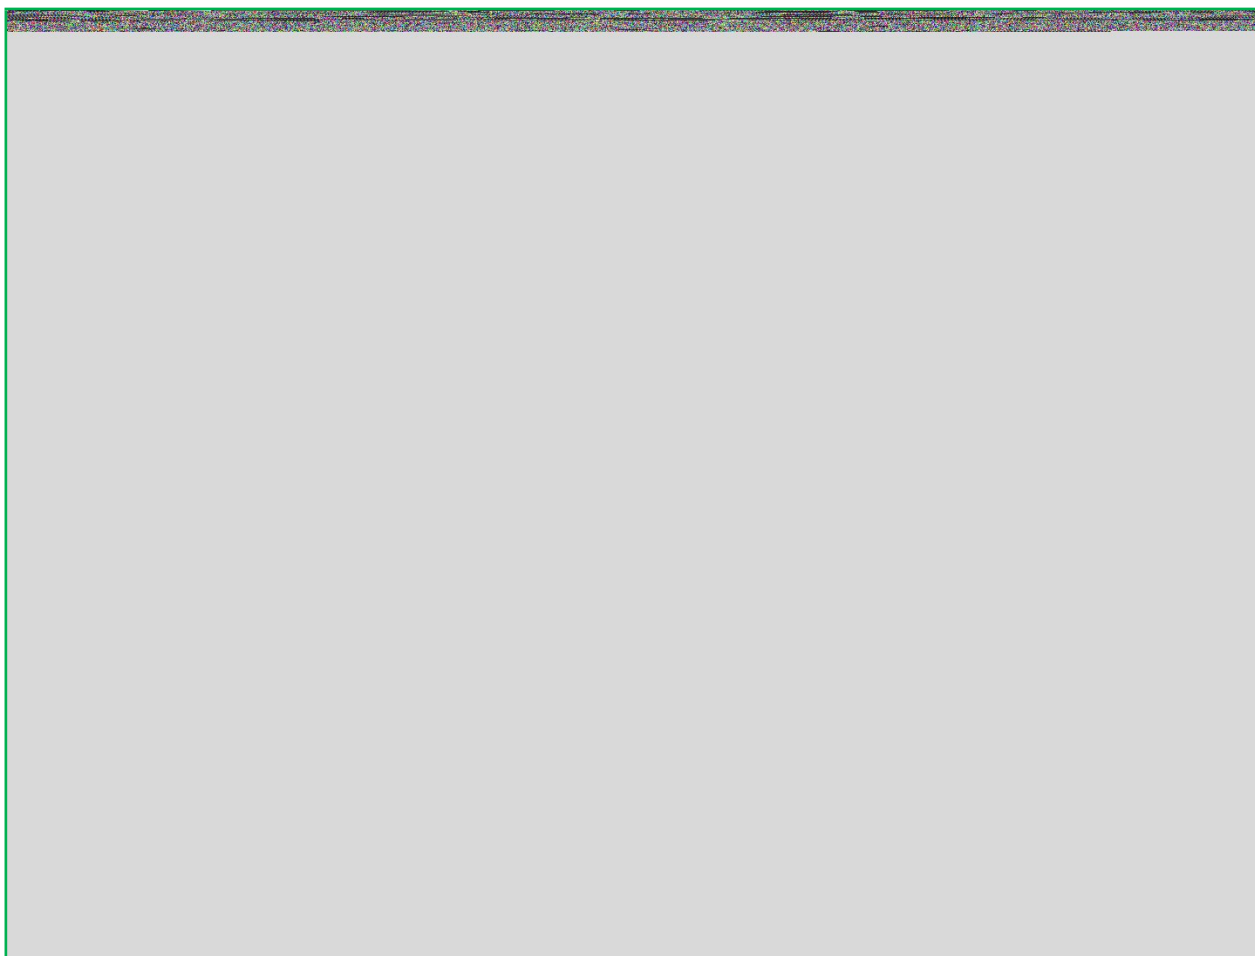

**5,5'-(1,4-Phenylenebis(methanylylidene))bis(2-thioxodihydropyrimidine-4,6(1*H*,5*H*)-dione) (4x)**

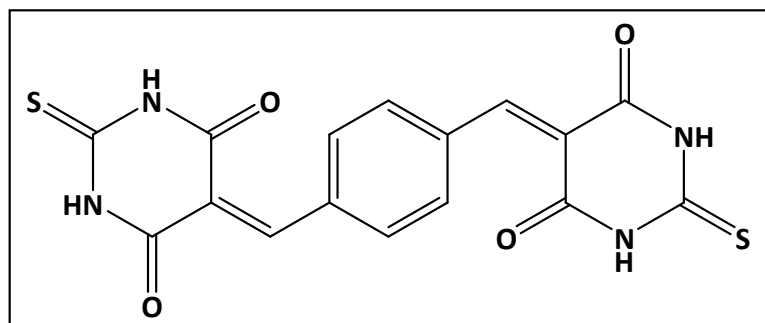

M.p. >300 °C; IR (KBr)  $\nu_{\text{max}}$ /cm<sup>-1</sup>: 3447, 3065, 2913, 1624, 1442; <sup>1</sup>HNMR (400 MHz, DMSO-d<sub>6</sub>):  $\delta$  (ppm) 8.05 (s, 4H), 8.29 (s, 2H, HC = C), 11.30 (NH, s, 2H), 11.45 (NH, s, 2H); <sup>13</sup>CNMR (100 MHz, DMSO-d<sub>6</sub>):  $\delta$  (ppm) 120.9, 129.0, 132.3, 136.1, 150.6, 153.4, 161.9, 163.6.

**FTIR**

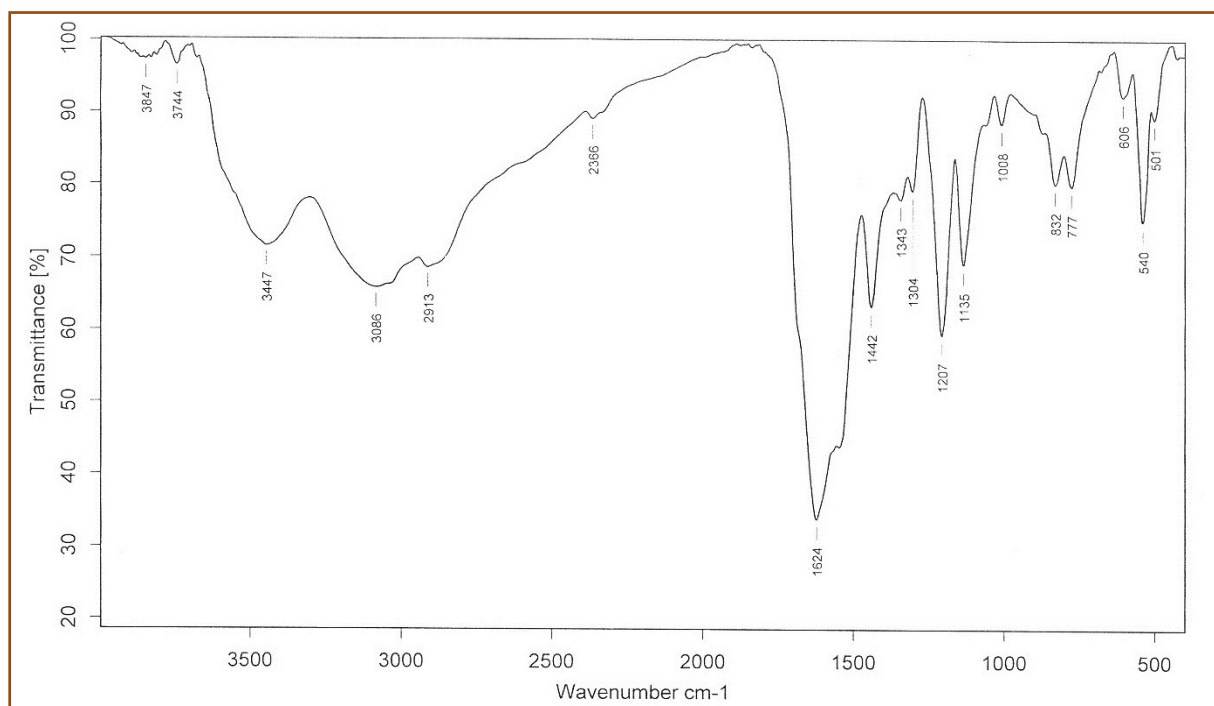

$^1\text{H}$ NMR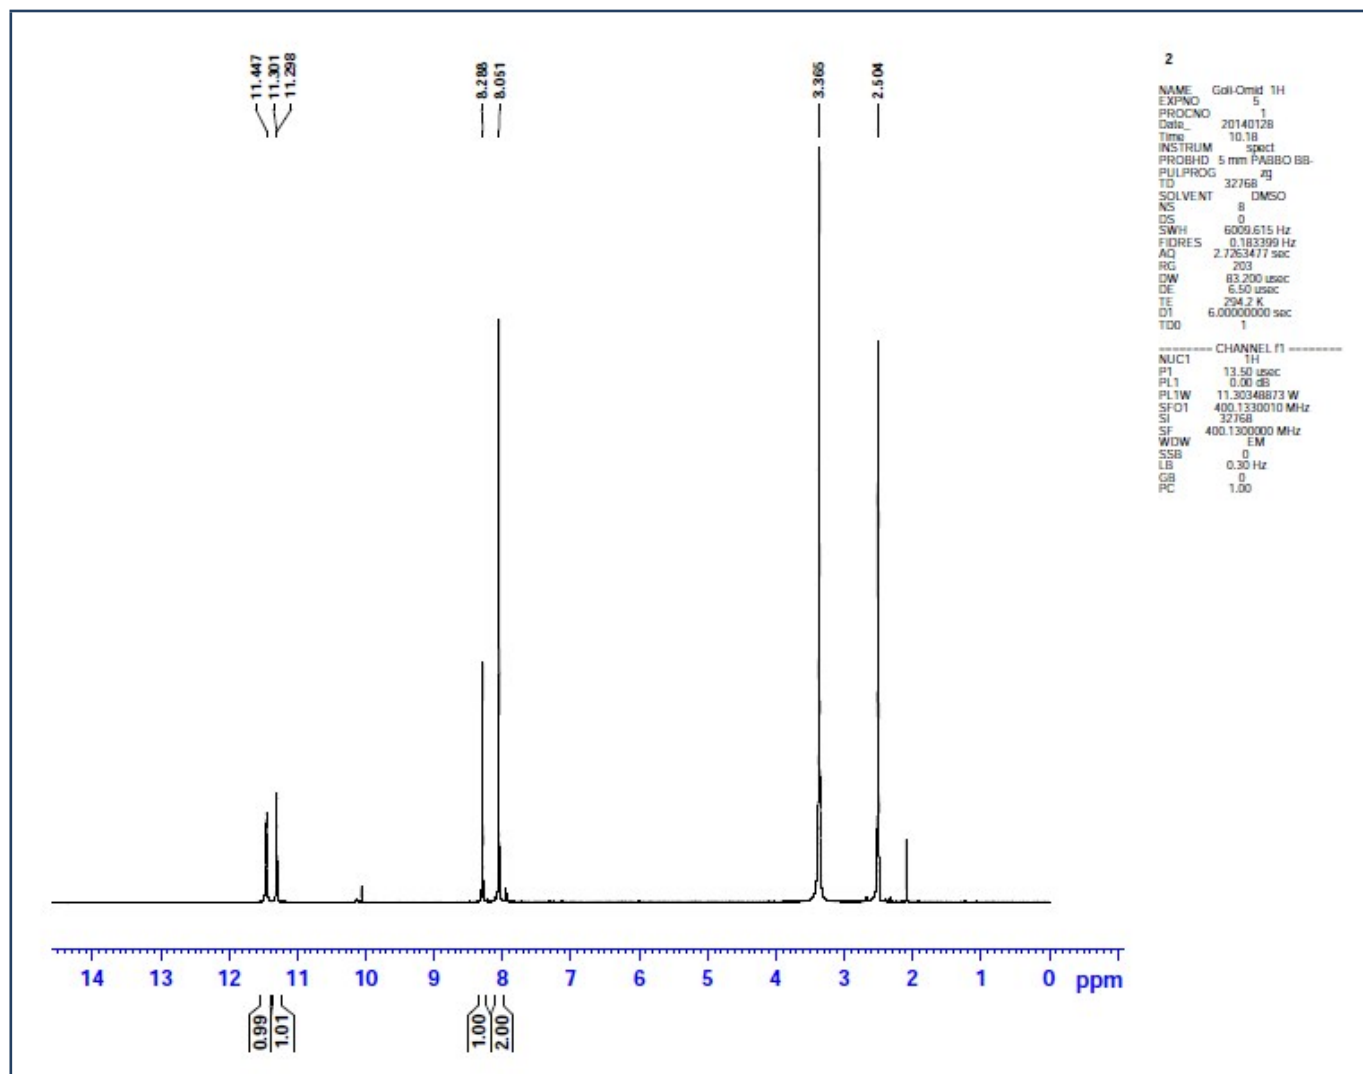

$^{13}\text{C}$ NMR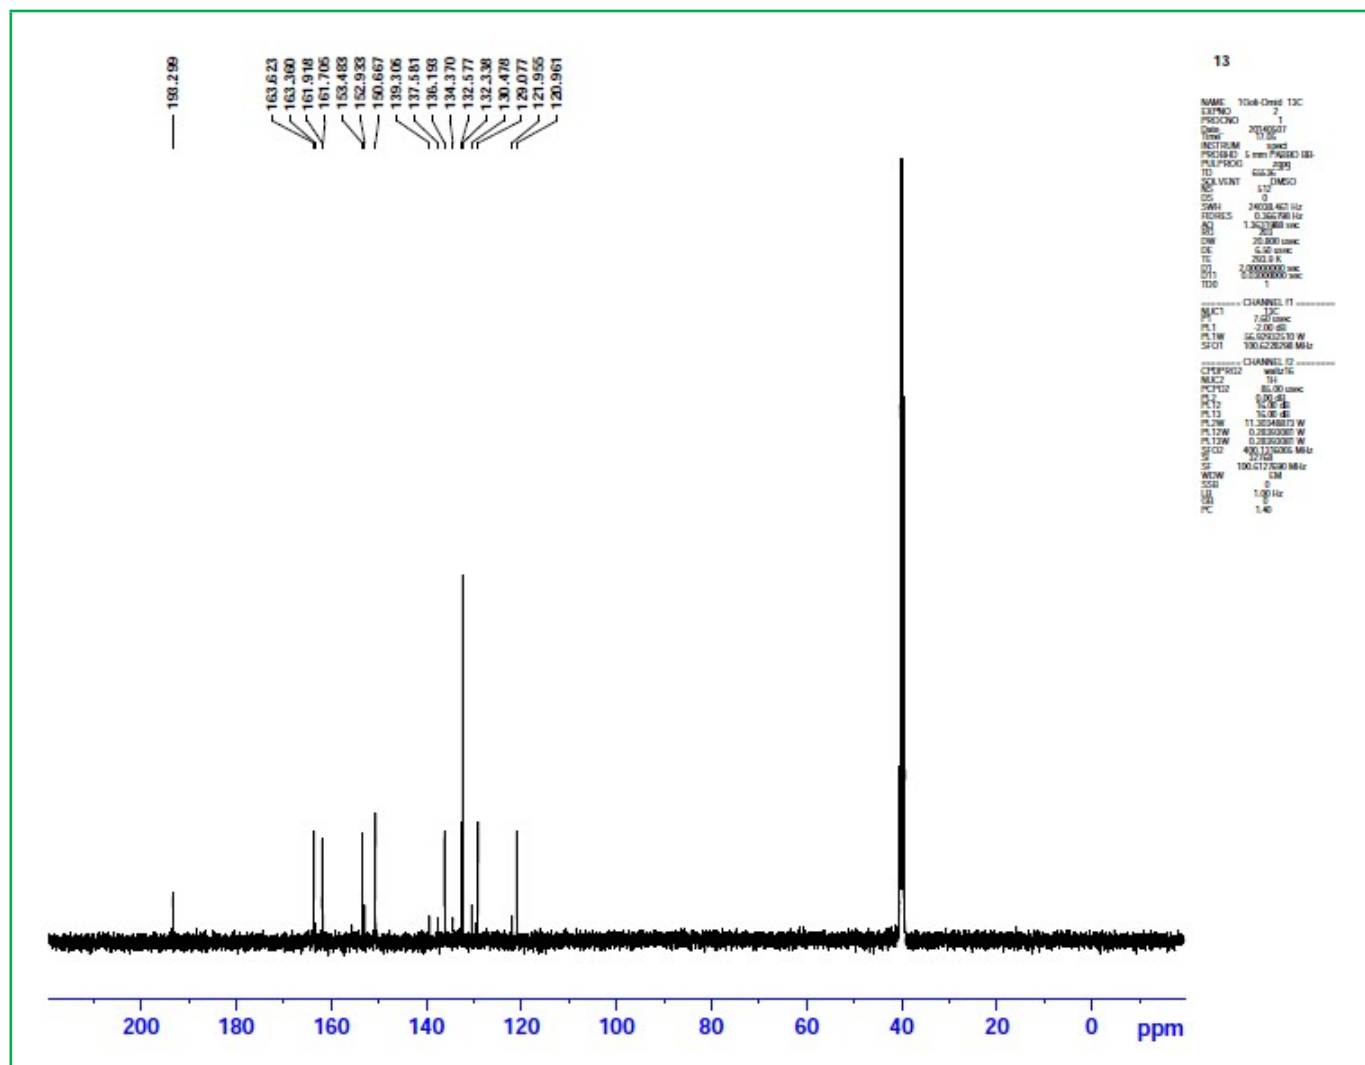

**5,5'-(1,3-phenylenebis(methanylylidene))bis(2-thioxodihydropyrimidine-4,6(1H,5H)-dione) (4y)**

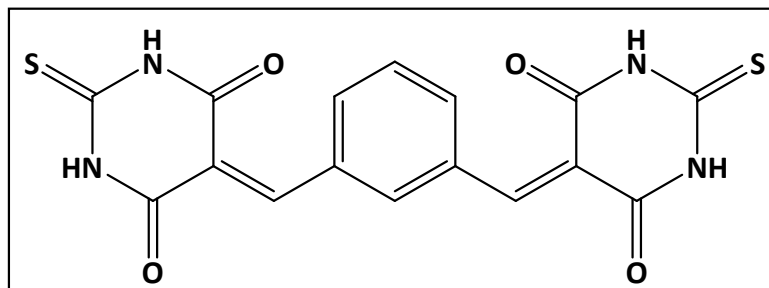

M.p. >300 °C; IR (KBr)  $\nu_{\max}/\text{cm}^{-1}$ : 3407, 3062, 2879, 1622, 1559, 1523, 1442;  $^1\text{H}$ NMR (400 MHz, DMSO- $d_6$ ):  $\delta$  (ppm) 7.55 (t,  $J = 7.6$ , 1H), 8.20 (dd,  $J_1 = 7.8$ ,  $J_2 = 1.6$ , 2H), 8.29 (s, 2H, HC=C), 8.49 (s, 1H), 11.29 (NH, s, 2H), 11.44 (NH, s, 2H);  $^{13}\text{C}$ NMR (400 MHz, DMSO- $d_6$ ) (d, ppm) = 120.3, 128.0, 132.9, 135.9, 137.6, 150.6, 153.9, 161.9, 163.6.

**FTIR**

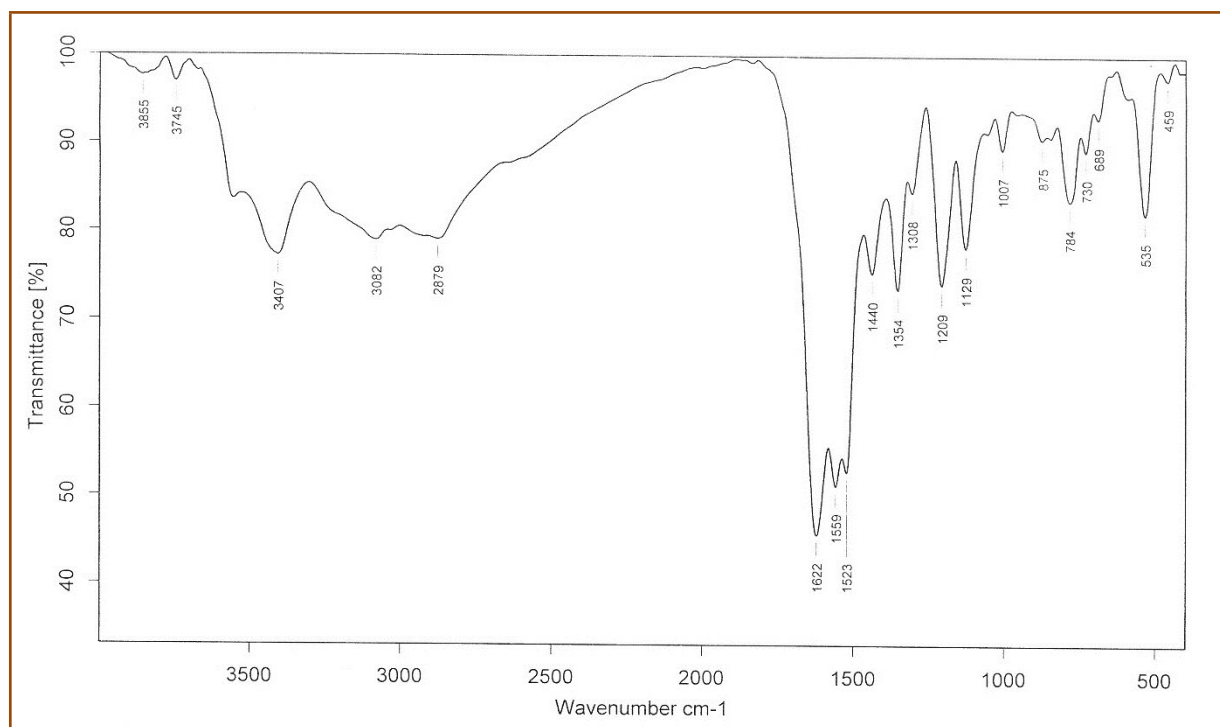

$^1\text{H}$ NMR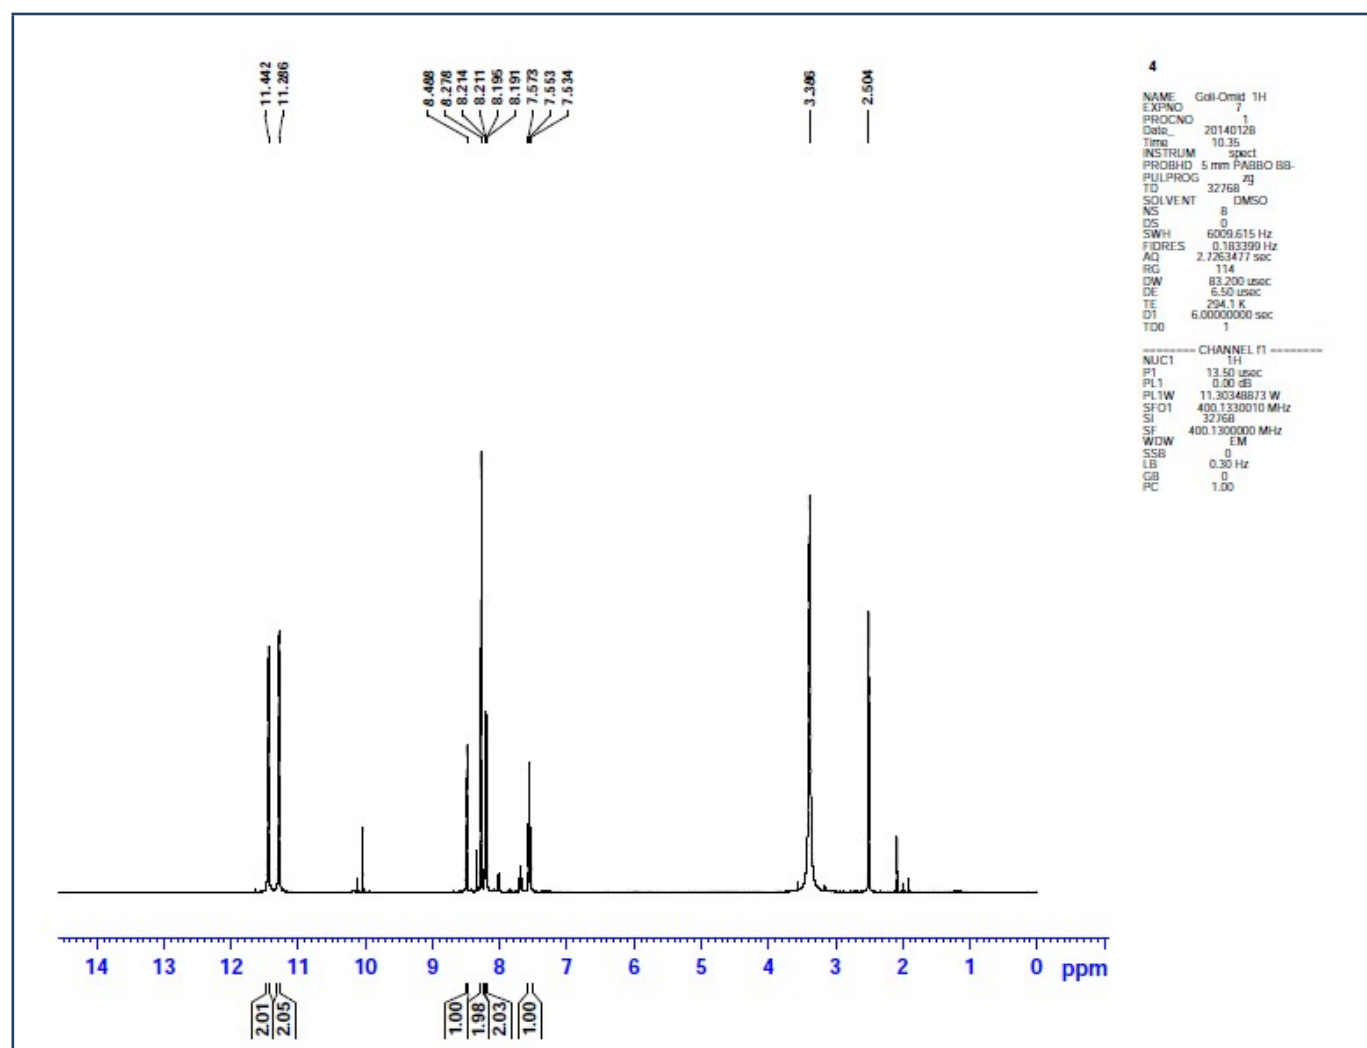

<sup>13</sup>CNMR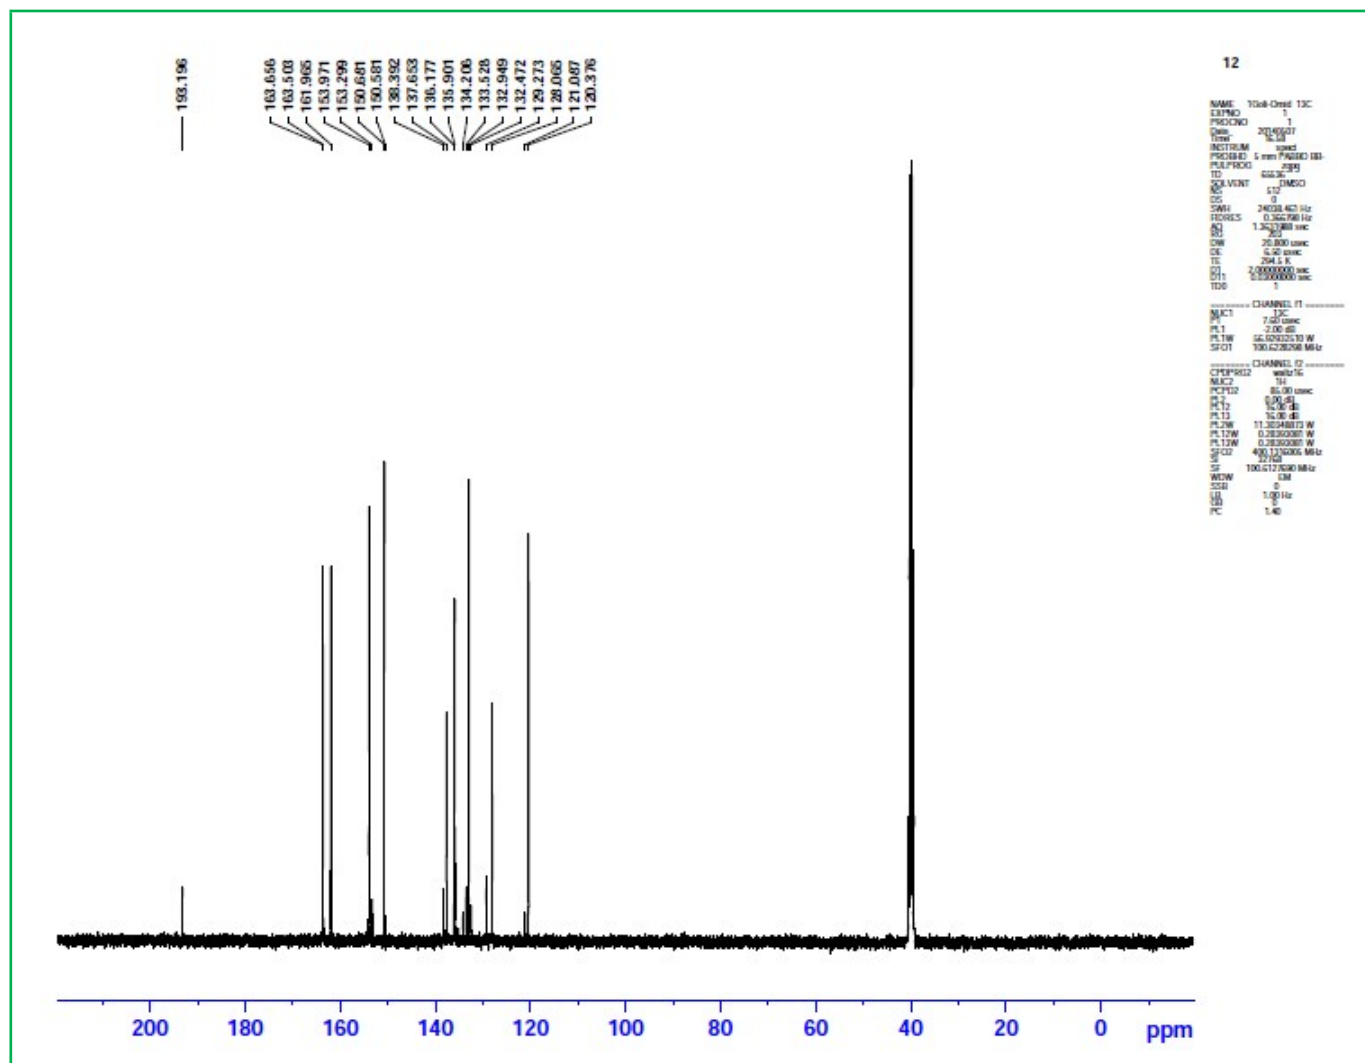

**7-Amino-5-(2-nitrophenyl)-4-oxo-2-thioxo-1,3,4,5-tetrahydro-2H-pyrano[2,3-d]pyrimidine-6-carbonitrile (5r)**

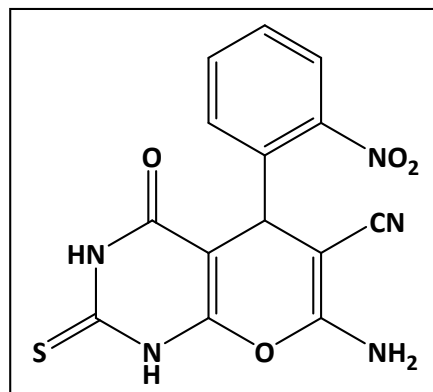

M.p. =242-246 °C; IR (KBr)  $\nu_{\max}/\text{cm}^{-1}$ : 3426, 3062, 2197, 1675, 1573, 1518, 1349;  $^1\text{H}$ NMR (400 MHz, DMSO- $d_6$ ):  $\delta$  (ppm) 5.06 (s, 1H), 7.34 (s, 2H), 7.48 (dt,  $J_1 = 7.6$  Hz,  $J_2 = 1.6$  Hz, 1H), 7.54 (dd,  $J_1 = 8$  Hz,  $J_2 = 1.2$  Hz, 1H), 7.67 (dt,  $J_1 = 7.6$  Hz,  $J_2 = 1.2$  Hz, 1H), 7.86 (dd,  $J_1 = 8$  Hz,  $J_2 = 1.2$  Hz, 1H), 12.43 (NH, s, 1H), 13.67 (NH, s, 1H);  $^{13}\text{C}$ NMR (100 MHz, DMSO- $d_6$ ):  $\delta$  (ppm) 30.7, 56.9, 93.4, 119.0, 124.2, 128.6, 131.5, 133.9, 138.0, 149.7, 152.1, 158.6, 160.7, 174.4.

**FTIR**

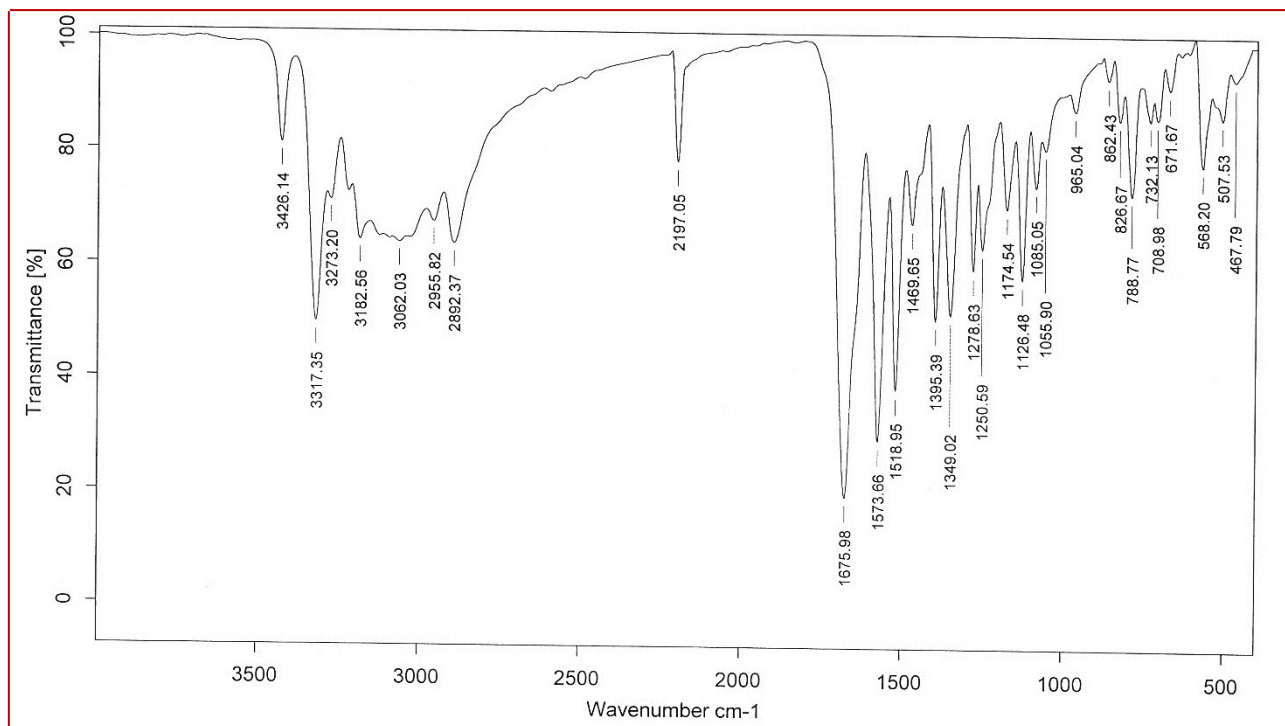



$^1\text{H}$ NMR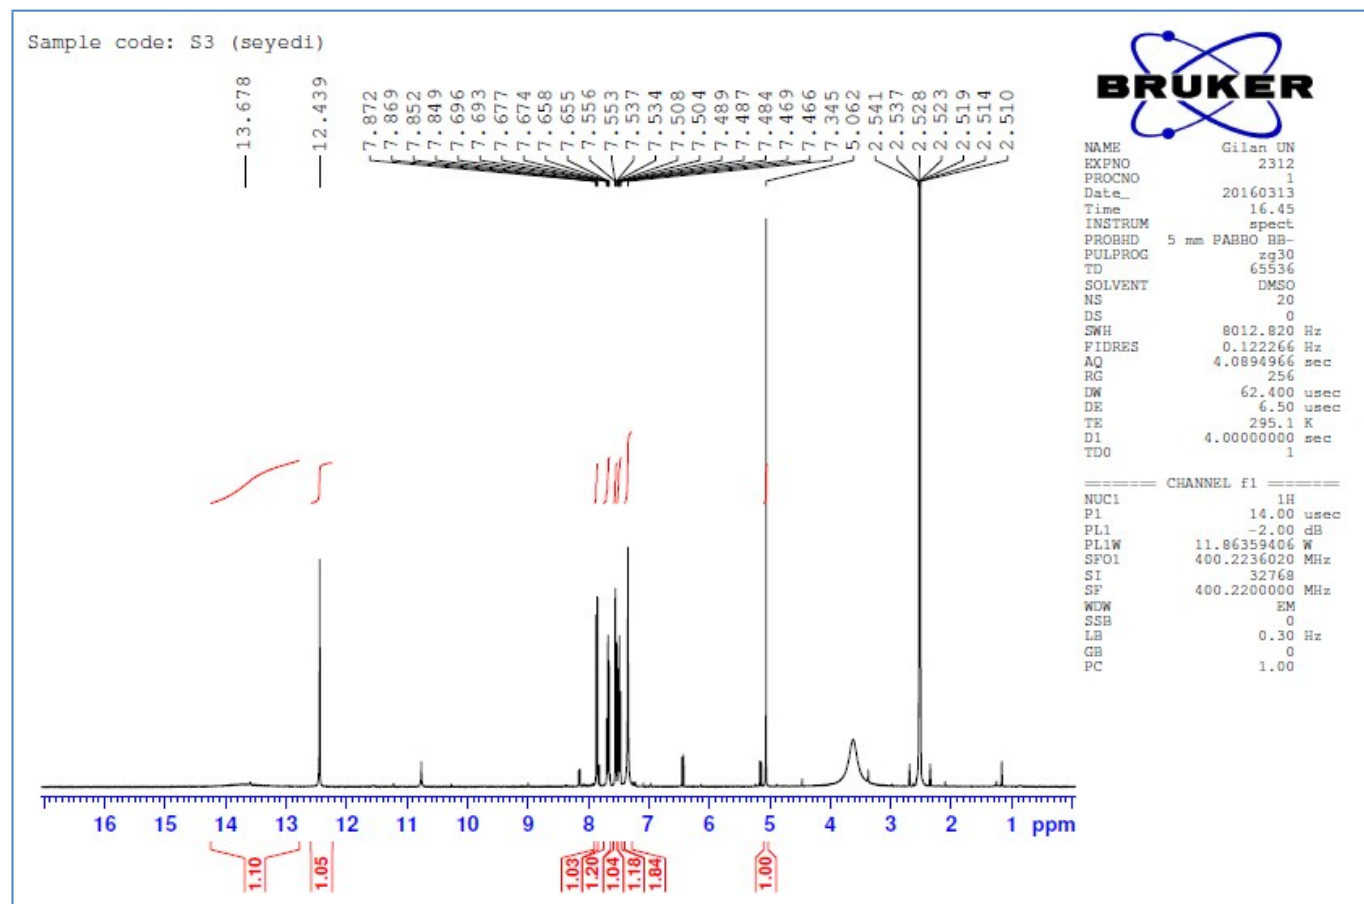

<sup>13</sup>CNMR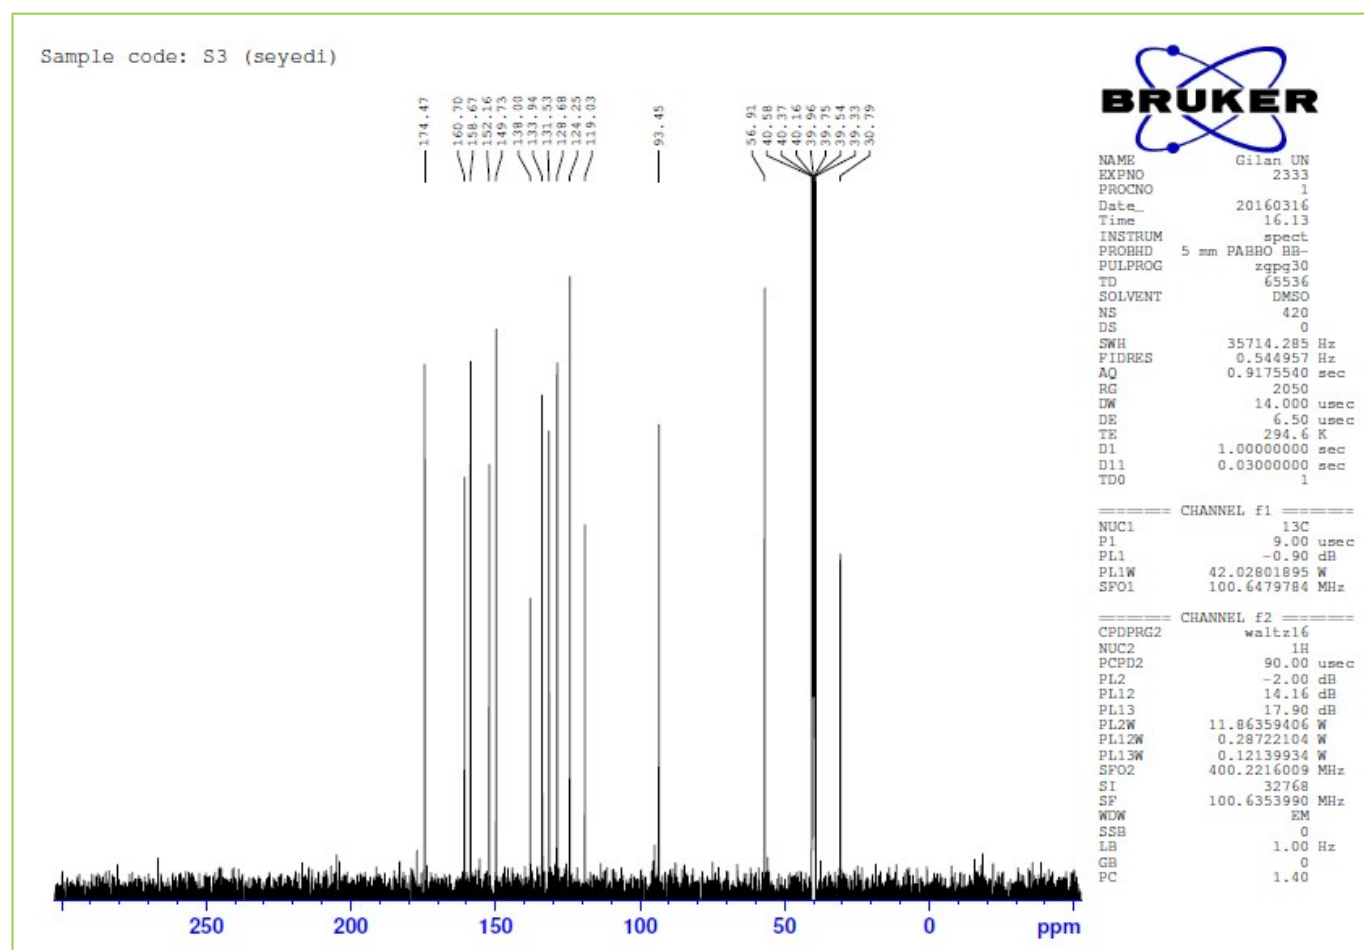

Supplement: c6ra05878g1.pdf [file c6ra05878g1.pdf]
